# Supplementary material for: Nanoconjugates of a calixresorcinarene derivative with methoxy poly(ethylene glycol) fragments for drug encapsulation
Source: publisher site journal article supplement (doi:10.3762/bjnano.9.195), 2018-07-27
Supplement: Additional file 1 [file 2190-4286-9-195-S1.pdf]

## Supporting Information

for

### **Nanoconjugates of a calixresorcinarene derivative with methoxy poly(ethylene glycol) fragments for drug encapsulation**

Alina M. Ermakova<sup>1,2</sup>, Julia E. Morozova\*<sup>1,2</sup>, Yana V. Shalaeva<sup>1,2</sup>, Victor V. Syakaev<sup>1</sup>, Aidar T. Gubaidullin<sup>1</sup>, Alexandra D. Voloshina<sup>1</sup>, Vladimir V. Zobov<sup>1</sup>, Irek R. Nizameev<sup>1,3</sup>, Olga B. Bazanova<sup>1</sup>, Igor S. Antipin<sup>1,2</sup> and Alexander I. Konovalov<sup>1</sup>

Address: <sup>1</sup>Arbuzov Institute of Organic and Physical Chemistry, FRC Kazan Scientific Center of RAS, Arbuzov str. 8, 420088 Kazan, Russian Federation; <sup>2</sup>Kazan Federal University, Kremlevskaya st. 18, 420008 Kazan, Russian Federation and <sup>3</sup>Kazan National Research Technical University named after A. N. Tupolev – KAI, K. Marx str. 10, 420111 Kazan, Russian Federation

Email: Julia E. Morozova\* - ernestina34@gmail.com

\* Corresponding author

### **Additional experimental data**

| Contents                                                                                                                                                                                                                                                                                                                                                                                                                                                                                                                                                                                                                                                    | Page |
|-------------------------------------------------------------------------------------------------------------------------------------------------------------------------------------------------------------------------------------------------------------------------------------------------------------------------------------------------------------------------------------------------------------------------------------------------------------------------------------------------------------------------------------------------------------------------------------------------------------------------------------------------------------|------|
| <b>Figure S1:</b> $^{13}\text{C}$ NMR spectra of macrocycle <b>1</b> in acetone- $d_6$ (top) and of macrocycle <b>3</b> in $\text{D}_2\text{O}$ (bottom).                                                                                                                                                                                                                                                                                                                                                                                                                                                                                                   | S4   |
| <b>Figure S2:</b> $^1\text{H}$ NMR spectrum of <b>3</b> in $\text{CD}_3\text{OD}$ .                                                                                                                                                                                                                                                                                                                                                                                                                                                                                                                                                                         | S4   |
| <b>Figure S3:</b> Debye plots for <b>3</b> in ethanol solution, $c = 1\text{--}160$ mg/mL.                                                                                                                                                                                                                                                                                                                                                                                                                                                                                                                                                                  | S5   |
| <b>Figure S4:</b> MALDI-TOF mass spectrum of <b>3</b> (DHB, in the presence of CsCl).                                                                                                                                                                                                                                                                                                                                                                                                                                                                                                                                                                       | S5   |
| <b>Figure S5:</b> SAXS diffraction intensity profiles at $23\text{ }^\circ\text{C}$ (logarithmic scale) of an aqueous solution of <b>3</b> ( $c = 137$ mg/mL, blue curve) and water (red curve) in 2 mm glass capillaries. Scattering vector $s = 4\pi \sin\theta/\lambda$ , $\text{\AA}^{-1}$ ; $\lambda = 1.5418$ $\text{\AA}$ is the X-ray wavelength.                                                                                                                                                                                                                                                                                                   | S6   |
| <b>Figure S6:</b> (a) The fitting of experimental SAXS curve and (b) calculated distance distribution functions $\rho(r)$ for the sample; circles: measurement, solid line: calculated curves.                                                                                                                                                                                                                                                                                                                                                                                                                                                              | S6   |
| <b>Figure S7:</b> MALDI-TOF mass spectrum of mPEG-550 ( $p$ -NA).                                                                                                                                                                                                                                                                                                                                                                                                                                                                                                                                                                                           | S7   |
| <b>Figure S8:</b> The dependence of pyrene I/III in aqueous solutions of macrocycle <b>3</b> and the pure mPEG-550.                                                                                                                                                                                                                                                                                                                                                                                                                                                                                                                                         | S7   |
| <b>Table S1:</b> The DLS data for aqueous solutions of <b>3</b> .                                                                                                                                                                                                                                                                                                                                                                                                                                                                                                                                                                                           | S8   |
| <b>Figure S9:</b> Zeta potential of <b>3</b> particles in aqueous solution ( $c = 5$ mg/mL), $25\text{ }^\circ\text{C}$ .                                                                                                                                                                                                                                                                                                                                                                                                                                                                                                                                   | S9   |
| <b>Figure S10:</b> Intensity-averaged particle size distribution for a solution of <b>3</b> in PBS (pH 7.4) at different temperatures ( $c_3 = 10$ mg/mL).                                                                                                                                                                                                                                                                                                                                                                                                                                                                                                  | S9   |
| <b>Figure S11:</b> (a) Intensity-averaged particle size distribution for a solution of <b>3</b> + Dox, $c_3 = 30$ mg/mL; (b) fluorescence spectra of Dox in PBS solution ( $c_{\text{Dox}} = 0.03$ mg/mL) and of <b>3</b> + Dox micelles in PBS solution; (1): $c_3 = 3.8$ mg/mL, $c_{\text{Dox}} = 0.3$ mg/mL; (2): $c_3 = 30$ mg/mL, $c_{\text{Dox}} = 0.4$ mg/mL; $\lambda_{\text{ex}} = 500$ nm, ex/em slit 5/5, voltage: 800 V; (c, d) fluorescence spectra of (c) Dox·HCl in PBS solution and of mPEG-550+Dox·HCl in PBS solution and of (d) <b>3</b> + Dox·HCl in PBS solution; $c_{\text{Dox}} = 0.14$ mg/mL; $c_3 = 3.3$ mg/mL, $c_{\text{mPEG-}}$ | S10  |

$c_{550} = 9.9$  mg/mL;  $\lambda_{\text{ex}} = 500$  nm; (c) ex/em slit 2.5/2.5, voltage: 700 V, (d) ex/em slit 5/2.5, voltage: 800 V. The spectra of **3** in PBS solution, the spectra of mPEG-550 in PBS solution, and the spectra of PBS are added as reference.

**Figure S12:** Fluorescence spectra of Naproxene sodium (NS) in PBS solution, and in the presence of mPEG-550 and **3** in PBS solution. The spectra of **3** in PBS solution and the spectra of PBS are added as a reference.  $c_{\text{NS}} = 1$  mM,  $c_3 = 6.7$  mg/mL;  $c_{\text{mPEG}} = 5.8$  mg/mL;  $\lambda_{\text{ex}} = 279$  nm, ex/em slit 1.5/2.5, voltage: 800 V. S11

**Figure S13:** (a) Fluorescence spectra of RhB in PBS solution, and in the presence of mPEG-550 and **3** in PBS solution. The spectrum of PBS solution is added as a reference.  $c_{\text{RhB}} = 0.01$  mM,  $c_3 = 19$  mg/mL,  $C_{\text{mPEG}} = 15.4$  mg/mL;  $\lambda_{\text{ex}} = 554$  nm, ex/em slit 1.5/1.5, voltage: 800 V; (b) intensity-averaged particle size distribution for solutions of **3** ( $c_3 = 160$  mg/mL) and **3** + RhB ( $C_3 = 150$  mg/mL). S11

**Figure S14:** Fluorescence spectra of Dox in 0.9% NaCl solution at different temperatures. (a) Pure Dox solution,  $c_{\text{Dox}} = 0.03$  mg/mL; (b) **3** + Dox micellar solution,  $c_3 = 30$  mg/mL,  $C_{\text{Dox}} = 0.44$  mg/mL;  $\lambda_{\text{ex}} = 500$  nm, ex/em slit 5/5, voltage: 800 V. S12

References S12

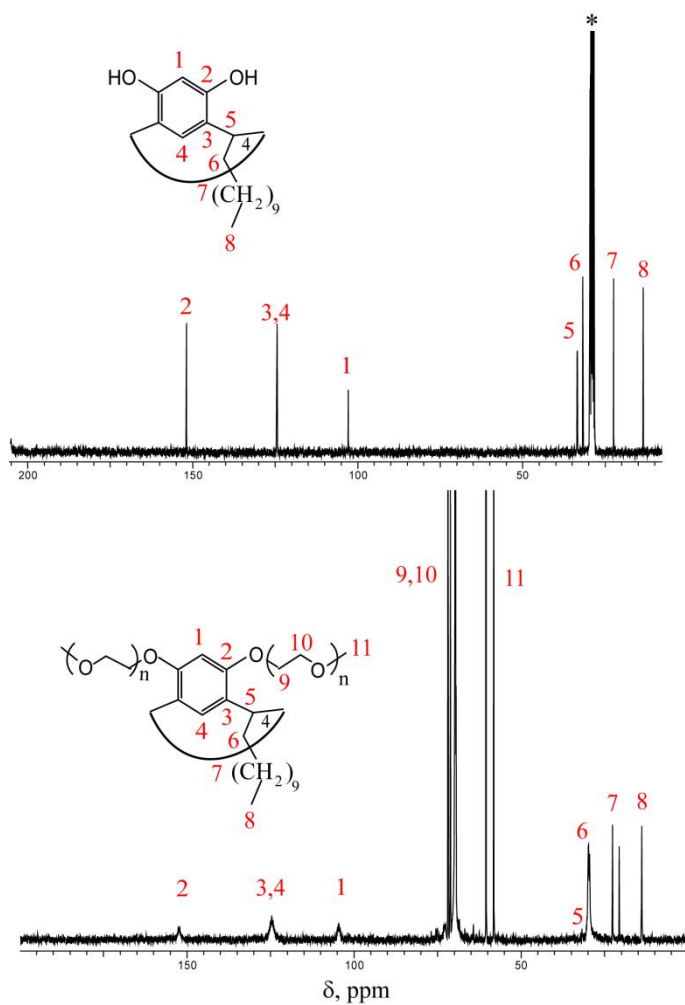

**Figure S1:**  $^{13}\text{C}$  NMR spectra of macrocycle **1** in acetone- $d_6$  (top) and of macrocycle **3** in  $\text{D}_2\text{O}$  (bottom).

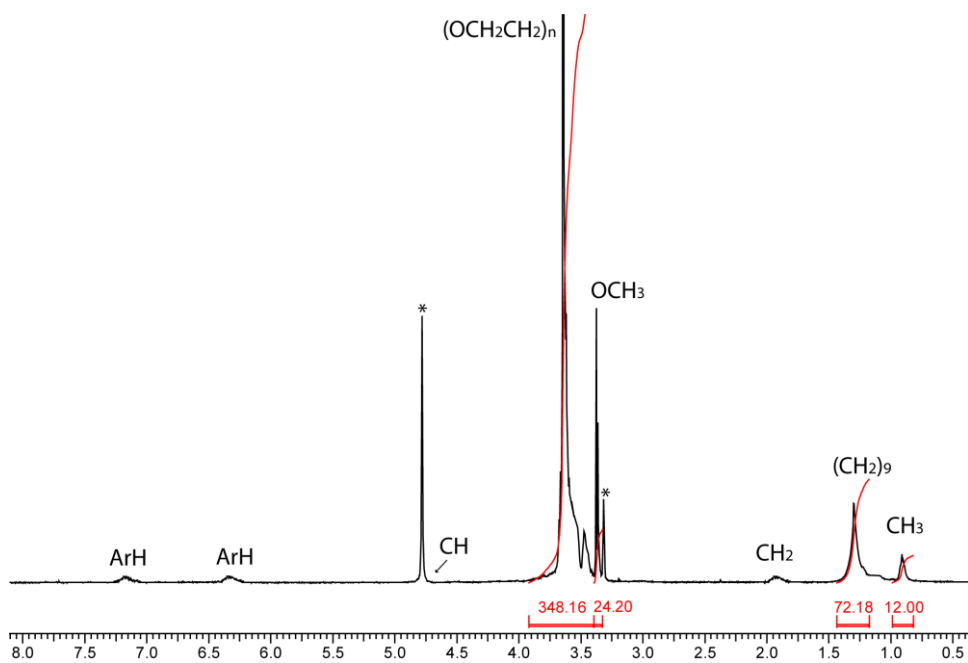

**Figure S2:**  $^1\text{H}$  NMR spectrum of **3** in  $\text{CD}_3\text{OD}$ .

In the  $^1\text{H}$  NMR spectrum of **3**, the ratios between integral intensities of terminal methoxy groups (at 3.37 ppm) and methyl (at 0.91 ppm) and  $(\text{CH}_2)_9$  groups (at 1.30 ppm) are 6/3 and 6/18, respectively. This testifies the complete substitution of the hydroxyl groups of the macrocycle **1** and allows one to estimate the common quantity of attached ethyleneoxy groups and the average molecular mass of **3**. The integral intensity of the signal at 3.65 ppm corresponds to approximately 86 ethyleneoxy groups per one macrocycle molecule, which gives an average molecular mass about 5.0 kDa.

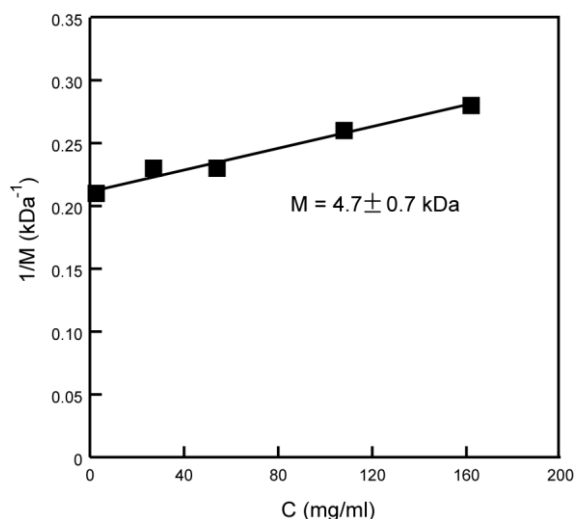

**Figure S3:** Debye plots for **3** in ethanol solution,  $c = 1\text{--}160$  mg/mL.

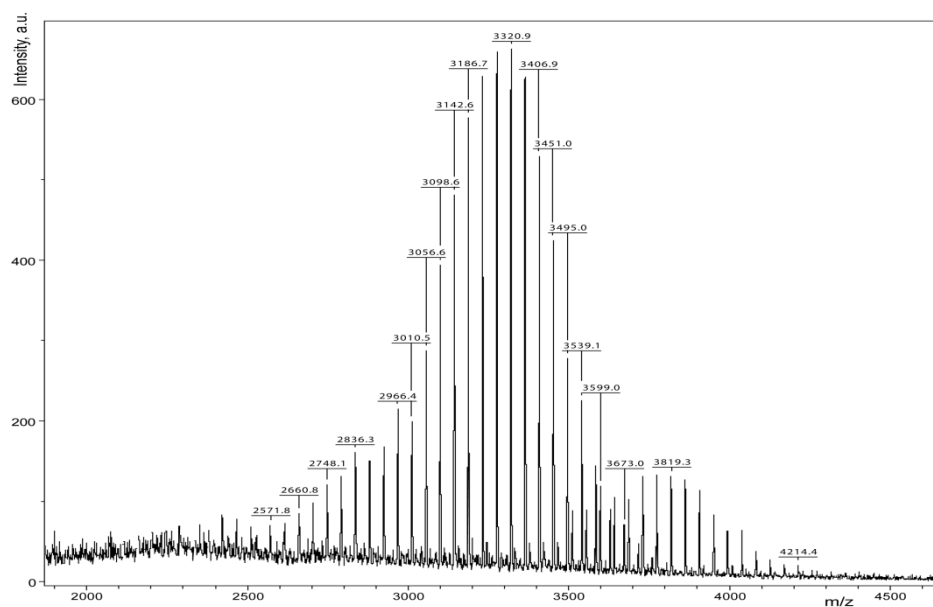

**Figure S4:** MALDI-TOF mass spectrum of **3** (DHB, in the presence of CsCl).

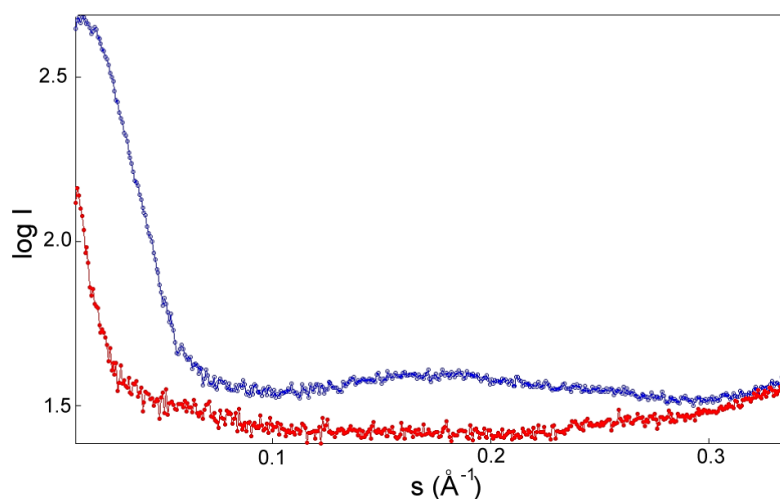

**Figure S5:** SAXS diffraction intensity profiles at 23 °C (logarithmic scale) of an aqueous solution of **3** ( $c = 137$  mg/mL, blue curve) and water (red curve) in 2 mm glass capillaries. Scattering vector  $s = 4\pi \sin\theta/\lambda$ ,  $\text{\AA}^{-1}$ ;  $\lambda = 1.5418$   $\text{\AA}$  is the X-ray wavelength.

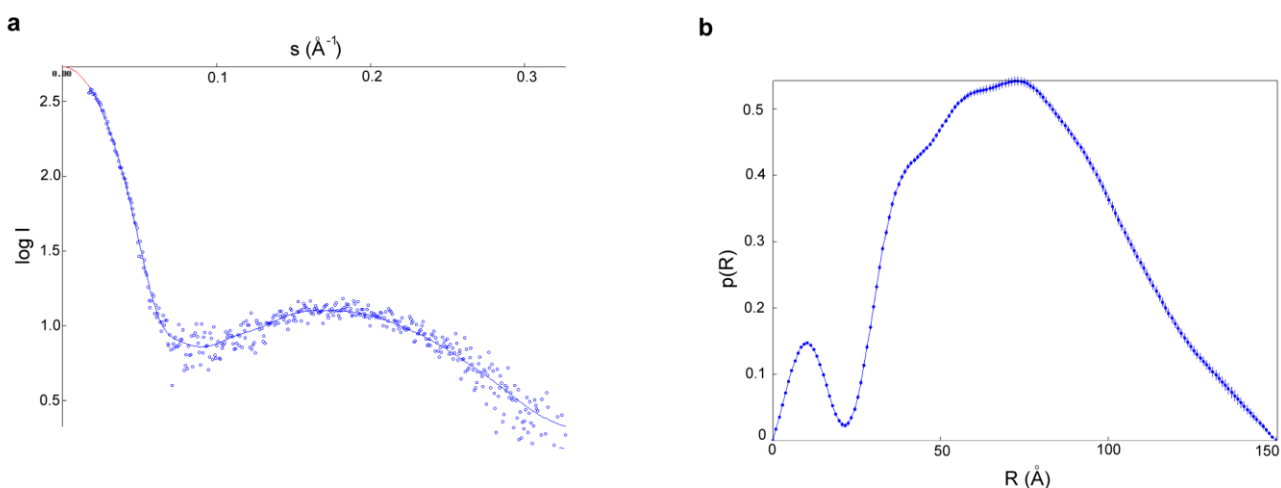

**Figure S6:** (a) The fitting of experimental SAXS curve and (b) calculated distance distribution functions  $p(r)$  for the sample; circles: measurement, solid line: calculated curves.

The values of radius of gyration  $R_g$  ( $53.5 \pm 1.8$   $\text{\AA}$ , by Guinier plot) in the case of a sphere-shape model correspond to an average effective particles radius of  $71.5$   $\text{\AA}$  (diameter of about  $143$   $\text{\AA}$ ). Taking into account the values of the average lengths of hydrophobic tail and phenyl ring of macrocycle (about  $13.9$   $\text{\AA}$  and  $2.8$   $\text{\AA}$ , respectively), the average thickness of hydrophilic shell, consisting of mPEG chains, is about  $54.8$   $\text{\AA}$ . The effective length of an oxyethylene group is about  $3.5$   $\text{\AA}$  [1]), therefore the maximum number of the oxyethylene groups in the mPEG chains attached to OH groups of macrocycle platform is 15–16. This is consistent with the distribution of oxyethylene groups in the initial mPEG-550 (see below).

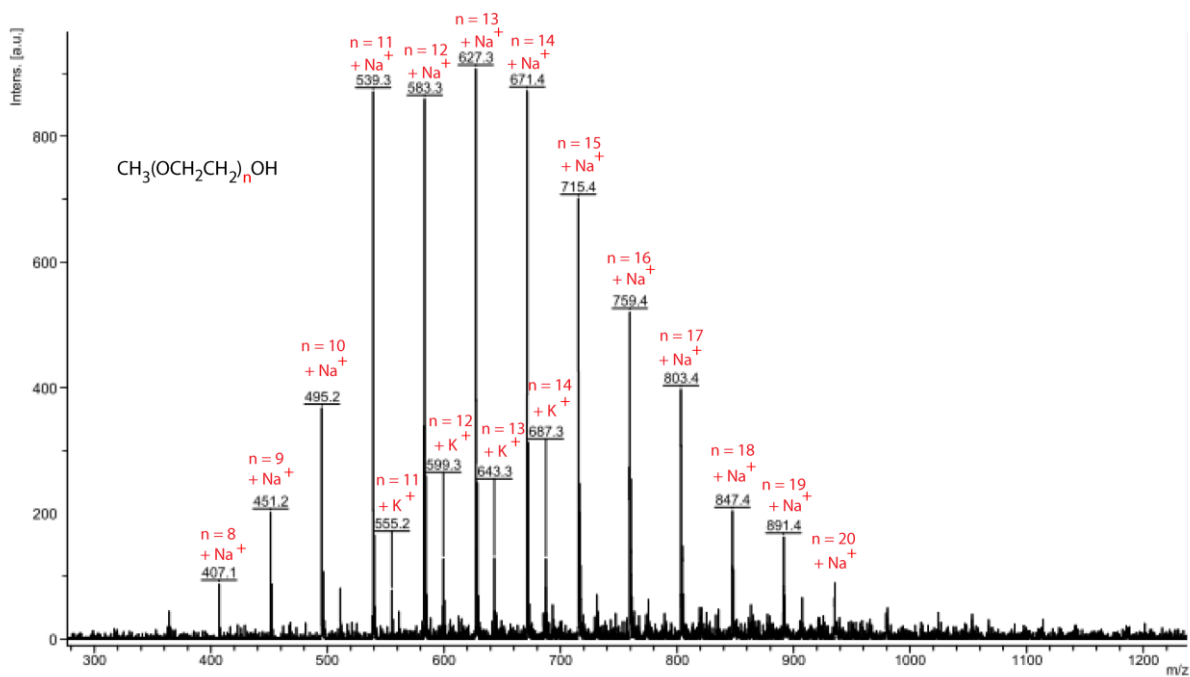

**Figure S7:** MALDI-TOF mass spectrum of mPEG-550 (*p*-NA).

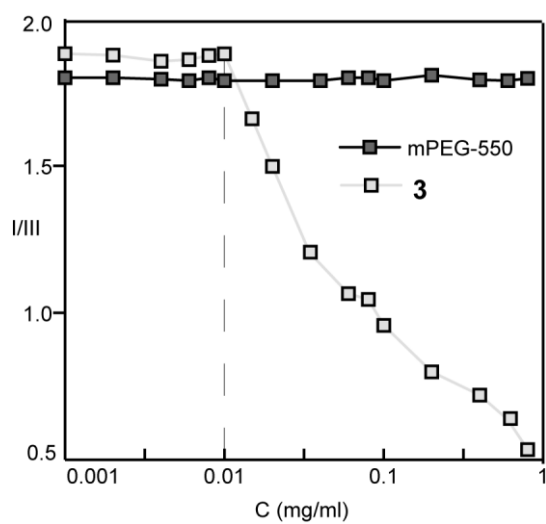

**Figure S8:** The dependence of pyrene I/III in aqueous solutions of macrocycle **3** and the pure mPEG-550.

**Table S1:** The DLS data for aqueous solutions of **3**.

| $c_3$ , mg/mL                         | addition   | $T$ , °C | $I$ (%) <sup>a</sup>                | $N$ (%) <sup>b</sup> | $V$ (%) <sup>c</sup> | PDI   |
|---------------------------------------|------------|----------|-------------------------------------|----------------------|----------------------|-------|
| 160                                   | —          | 25       | 18.17 (11); 531.2 (3.6)             | 10.1 (17.2)          | 11.7 (16.3)          | 0.518 |
| 100                                   | —          | 25       | 11.7 (13); 68.06 (1.8); 396.1 (3.2) | 7.531 (21)           | 8.721 (19.6)         | 0.465 |
| 55                                    | —          | 25       | 8.721 (13.1); 122.4 (3.3)           | 5.615 (15.1)         | 6.503 (16.4)         | 0.366 |
| 30                                    | —          | 25       | 8.721 (12.8); 164.2 (3.1)           | 7.531 (33.3)         | 7.531 (30.6)         | 0.624 |
| 10                                    | —          | 25       | 8.721 (17.3); 58.77 (4.9)           | 6.503 (29.5)         | 7.531 (26.8)         | 0.365 |
| 3                                     | —          | 25       | 8.721 (12.8); 58.77 (11.7)          | 7.531 (33.3)         | 7.531 (30.6)         | 0.624 |
| experiments at different temperatures |            |          |                                     |                      |                      |       |
| 10                                    | —          | 25       | 8.721 (16.4); 68.06 (6.1)           |                      |                      | 0.394 |
| 10                                    | —          | 35       | 8.721 (14.9); 78.8 (4.8)            |                      |                      | 0.357 |
| 10                                    | —          | 45       | 10.1 (23.4); 105.7 (5.5)            |                      |                      | 0.311 |
| 10                                    | —          | 55       | 10.1 (16.9); 91.28 (4.5)            |                      |                      | 0.294 |
| 10                                    | —          | 60       | 10.1 (17.6); 91.28 (4.7)            |                      |                      | 0.280 |
| 10                                    | —          | 65       | 11.7 (20.7); 105.7 (4.7)            |                      |                      | 0.268 |
| 10                                    | 0.9 % NaCl | 25       | 164.2 (27.9)                        |                      |                      | 0.232 |
| 10                                    | 0.9 % NaCl | 35       | 190.1 (14.8)                        |                      |                      | 0.275 |
| 10                                    | 0.9 % NaCl | 45       | 190.1 (17.8)                        |                      |                      | 0.273 |
| 10                                    | 0.9 % NaCl | 55       | 220.2 (12.5)                        |                      |                      | 0.340 |
| 10                                    | 0.9 % NaCl | 60       | 342 (25)                            |                      |                      | 0.154 |
| 10                                    | 0.9 % NaCl | 65       | 396 (33)                            |                      |                      | 0.132 |
| 10                                    | PBS        | 25       | 15.69 (8.1); 141.8 (17.2)           |                      |                      | 0.600 |
| 10                                    | PBS        | 35       | 18.17 (4.7); 164.2 (9.2)            |                      |                      | 0.577 |
| 10                                    | PBS        | 45       | 18.17 (4.7); 164.2 (12.1)           |                      |                      | 0.582 |
| 10                                    | PBS        | 55       | 21.04 (8.4); 164.2 (15.1)           |                      |                      | 0.522 |
| 10                                    | PBS        | 60       | 28.21 (7.2); 220.2 (12.5)           |                      |                      | 0.273 |
| 10                                    | PBS        | 65       | 28.21 (9); 396 (19)                 |                      |                      | 0.275 |
| Encapsulation of substrates           |            |          |                                     |                      |                      |       |
| 10                                    | QC         | 25       | 10.1 (12.4); 105.7 (8.2)            | 8.721 (12.2)         | 8.721 (11.6)         | 0.566 |
| 10                                    | Orange OT  | 25       | 10.1 (26.9); 342 (15.3)             | 8.721 (35.3)         | 10.1 (36.6)          | 0.602 |
| 30                                    | Dox        | 25       | 15.69 (16.4)                        | 11.7 (26.9)          | 11.7 (22.4)          | 0.205 |
| 150                                   | RhB        | 25       | 28.21 (8.5); 255 (4.7)              | 8.721 (25.1)         | 8.721 (17.2)         | 0.537 |

<sup>a</sup> intensity-averaged particles size distribution; <sup>b</sup> number-averaged particles size distribution; <sup>c</sup> intensity-averaged particles size distribution



|                                    | Mean (mV)            | Area (%) | Width (mV) |
|------------------------------------|----------------------|----------|------------|
| <b>Zeta Potential (mV):</b> -10.1  | <b>Peak 1:</b> -10.1 | 100.0    | 4.82       |
| <b>Zeta Deviation (mV):</b> 4.82   | <b>Peak 2:</b> 0.00  | 0.0      | 0.00       |
| <b>Conductivity (mS/cm):</b> 0.136 | <b>Peak 3:</b> 0.00  | 0.0      | 0.00       |

**Result quality:** Good

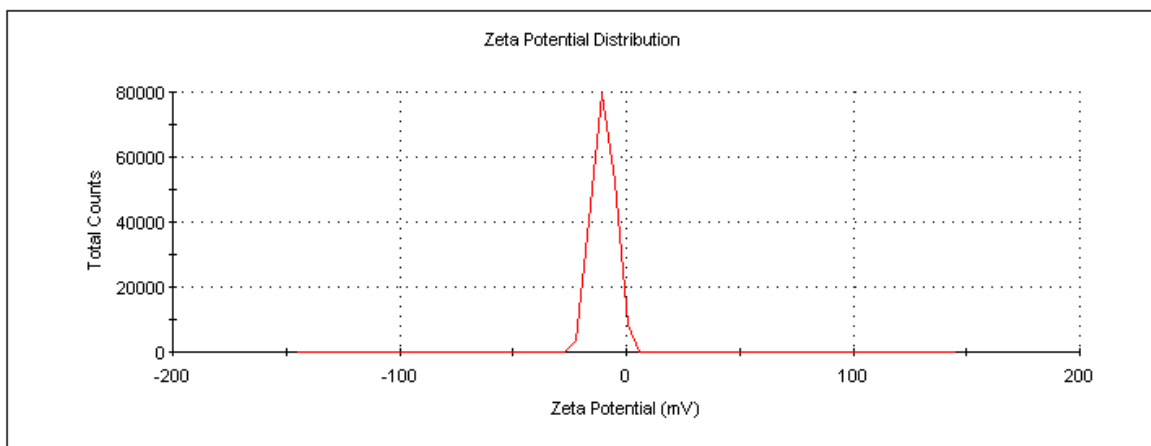

**Figure S9:** Zeta potential of **3** particles in aqueous solution ( $c = 5 \text{ mg/mL}$ ),  $25^\circ\text{C}$ .

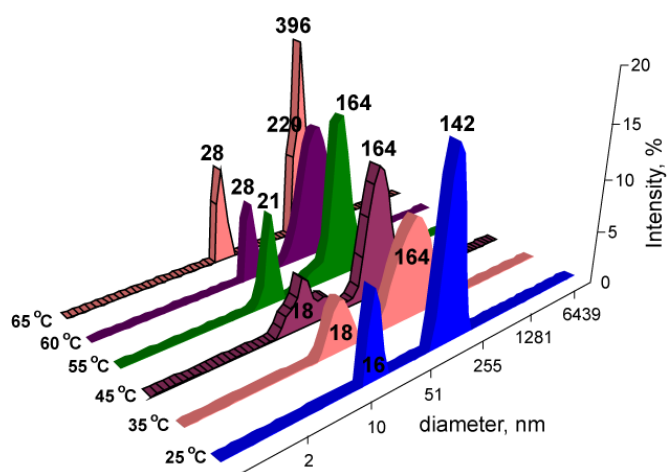

**Figure S10:** Intensity-averaged particle size distribution for a solution of **3** in PBS (pH 7.4) at different temperatures ( $c_3 = 10 \text{ mg/mL}$ ).

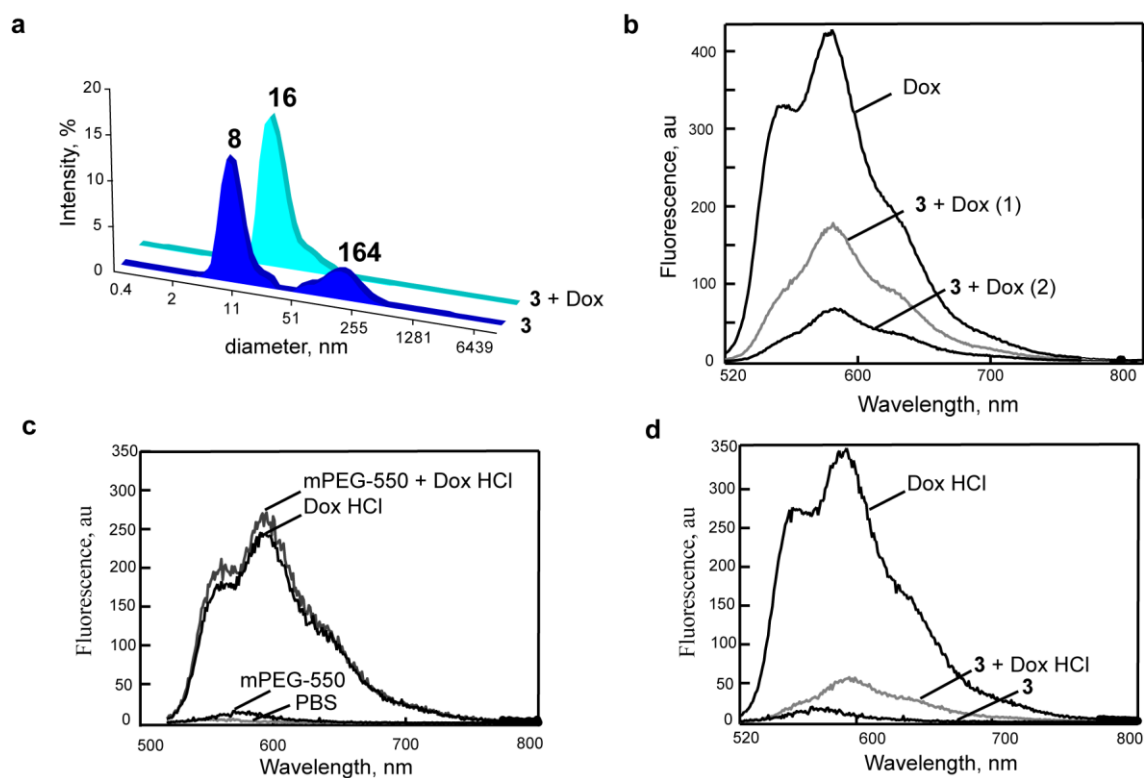

**Figure S11:** (a) Intensity-averaged particle size distribution for a solution of **3** + Dox,  $c_3 = 30$  mg/mL; (b) fluorescence spectra of Dox in PBS solution ( $c_{\text{Dox}} = 0.03$  mg/mL) and of **3** + Dox micelles in PBS solution; (1):  $c_3 = 3.8$  mg/mL,  $c_{\text{Dox}} = 0.3$  mg/mL; (2):  $c_3 = 30$  mg/mL,  $c_{\text{Dox}} = 0.4$  mg/mL;  $\lambda_{\text{ex}} = 500$  nm, ex/em slit 5/5, voltage: 800 V; (c, d) fluorescence spectra of (c) Dox·HCl in PBS solution and of mPEG-550+Dox·HCl in PBS solution and of (d) **3** + Dox·HCl in PBS solution;  $c_{\text{Dox}} = 0.14$  mg/mL;  $c_3 = 3.3$  mg/mL,  $c_{\text{mPEG-550}} = 9.9$  mg/mL;  $\lambda_{\text{ex}} = 500$  nm; (c) ex/em slit 2.5/2.5, voltage: 700 V, (d) ex/em slit 5/2.5, voltage: 800 V. The spectra of **3** in PBS solution, the spectra of mPEG-550 in PBS solution, and the spectra of PBS are added as reference.

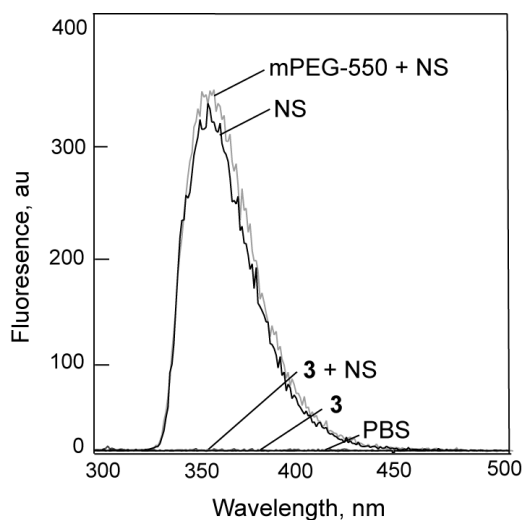

**Figure S12:** Fluorescence spectra of Naproxene sodium (NS) in PBS solution, and in the presence of mPEG-550 and **3** in PBS solution. The spectra of **3** in PBS solution and the spectra of PBS are added as a reference.  $c_{NS} = 1$  mM,  $c_3 = 6.7$  mg/mL;  $c_{mPEG} = 5.8$  mg/mL;  $\lambda_{ex} = 279$  nm, ex/em slit 1.5/2.5, voltage: 800 V.

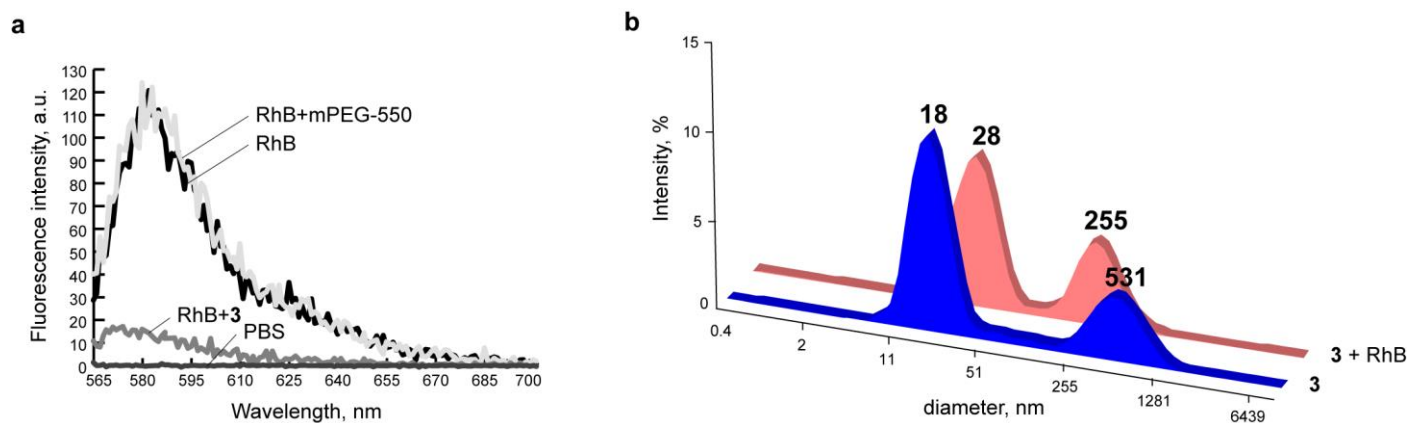

**Figure S13:** (a) Fluorescence spectra of RhB in PBS solution, and in the presence of mPEG-550 and **3** in PBS solution. The spectrum of PBS solution is added as a reference.  $c_{RhB} = 0.01$  mM,  $c_3 = 19$  mg/mL,  $C_{mPEG} = 15.4$  mg/mL;  $\lambda_{ex} = 554$  nm, ex/em slit 1.5/1.5, voltage: 800 V; (b) intensity-averaged particle size distribution for solutions of **3** ( $c_3 = 160$  mg/mL) and **3** + RhB ( $C_3 = 150$  mg/mL).

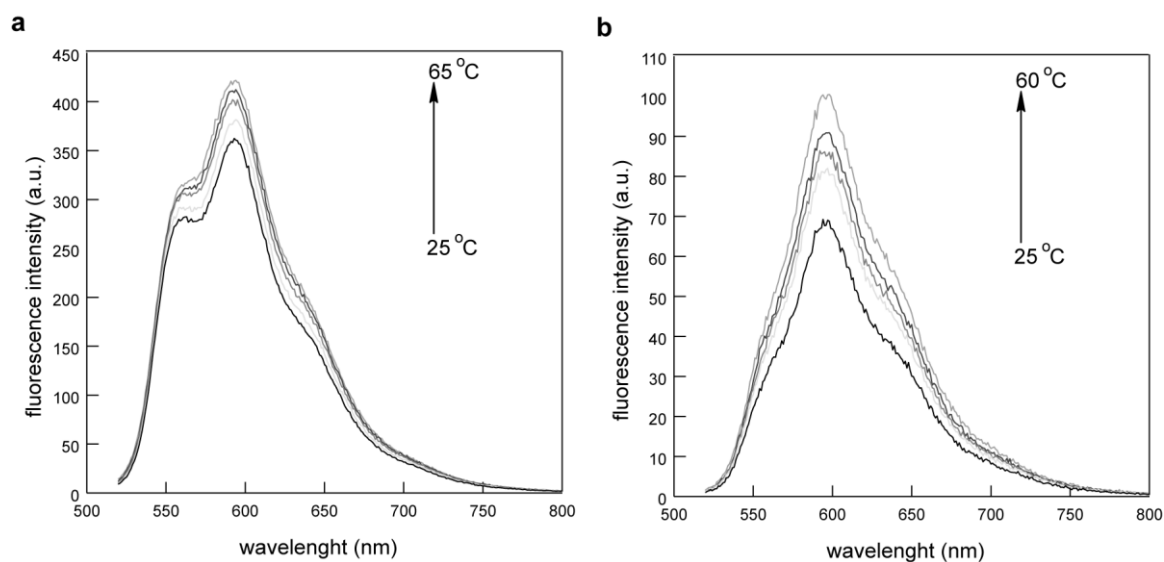

**Figure S14:** Fluorescence spectra of Dox in 0.9% NaCl solution at different temperatures. (a) Pure Dox solution,  $c_{\text{Dox}} = 0.03 \text{ mg/mL}$ ; (b) **3** + Dox micellar solution,  $c_3 = 30 \text{ mg/mL}$ ,  $C_{\text{Dox}} = 0.44 \text{ mg/mL}$ ;  $\lambda_{\text{ex}} = 500 \text{ nm}$ , ex/em slit 5/5, voltage: 800 V.

## References

1. Kenworthy, A. K.; Hristova, K.; Needham, D.; McIntosh, T.J. *Biophys. J.* **1995**, *68*, 1921–1995. doi:10.1016/S0006-3495(95)80369-3.
